1 **Determinants of quality Antenatal Care utilization in Kenya: insights from the**  
2 **2022 Kenya Demographic and Health Survey**

3 **Short running title:** Determinants of Quality Antenatal Care Utilization in Kenya

4 **John Baptist Asiiimwe<sup>1\*</sup>, Angella Namulema<sup>2</sup>, Quraish Sserwanja<sup>3</sup>, Joseph Kawuki<sup>4</sup>,**  
5 **Mathius Amperiize<sup>5</sup>, Earnest Amwiine<sup>6</sup>, Lilian Nuwabaine<sup>1</sup>**

6 <sup>1</sup> School of Nursing and Midwifery, Aga Khan University, Kampala, Uganda

7 Email: john.asiiimwe@aku.edu (JBA); lilliannuwabaine@gmail.com (LN);

8 <sup>2</sup> Mbarara Regional Referral Hospital, Mbarara, Uganda

9 Email: angelnamulema@gmail.com

10 <sup>3</sup> Programs Department, Relief International, Khartoum, Sudan

11 Email: [quraishsserwanja@gmail.com](mailto:quraishsserwanja@gmail.com) (QS)

12 <sup>4</sup> Program in Public Health, Department of Family, Population, & Preventive Medicine, Stony  
13 Brook, University, Stony Brook, NY, USA

14 Email: joseks256@gmail.com (JK)

15 <sup>5</sup> Faculty of Medicine, Mbarara University of Science & Technology, Mbarara, Uganda

16 Email: amwiineearnest@gmail.com (EA)

17 <sup>6</sup> Infectious Diseases Institute, Kampala, Uganda

18 Email: mathius166@gmail.com (MA)

19 **\* Corresponding authors**

20 **John Baptist Asiiimwe**

21 School of Nursing and Midwifery,

22 Aga Khan University, Kampala, Uganda

23 Tel: +256775979015; Email: john.asiiimwe@aku.edu

24 **Lilian Nuwabaine**

25 School of Nursing and Midwifery,

26 Aga Khan University, Kampala, Uganda

27 Tel: +256779218872/700386588

28 Email: lilliannuwabaine@gmail.com

29

30

## Abstract

31 **Introduction:** One of the most important strategies to lower mother and newborn fatalities  
32 worldwide is providing quality Antenatal care (ANC). The utilization of quality ANC by women  
33 of reproductive age and associated factors remains unclear in many developing countries.  
34 Therefore, the purpose of this study was to determine the factors associated with the utilization of  
35 quality ANC in Kenya.

36

37 **Methods:** We analyzed Secondary data from the Kenya Demographic Health Survey (KDHS)  
38 2022, which included 11,863 women. Participants were selected using a two-stage stratified  
39 sampling design. Using SPSS, version 20, univariate and multivariable logistic regression was  
40 used to analyze the data.

41 **Results:** Of the 11,863 women, 61.2% (95% CI: 59.7-62.6) received quality ANC. Older mothers  
42 (aged 20–34) had a 1.82 (95%CI: 1.15-2.87) times higher likelihood of receiving quality ANC  
43 when compared with younger mothers (15–19 years old). Participating mothers who had attended  
44 4 or more ANC visits were 1.42 (95%CI: 1.14-1.79) times more likely to receive quality ANC  
45 than those who attended 3 or fewer visits. Comparing participants with and without media access,  
46 those with media access were 1.47 (95%CI: 1.06-2.03) times more likely to receive quality ANC.  
47 Furthermore, the likelihood of receiving quality ANC was 1.93 (95%CI: 1.21-3.08) and 1.44  
48 (95%CI: 1.01-2.06) times higher for participants in the richest and richer quintiles, respectively,  
49 than for those in the poorest quintile. On the contrary, the odds of receiving quality ANC were  
50 0.25 (95%CI: 0.15-0.31) to 0.64 (95%CI: 0.44-0.92) times lower for participating mothers from  
51 all other Kenyan regions than for those from the coastal region. Participants whose husbands or  
52 partners made decisions for them to seek healthcare, compared with those who made decisions  
53 independently were 0.74 (95%CI: 0.58-0.95) times less likely to receive quality antenatal care.

54 **Conclusion:** The study revealed that about 60% of mothers received quality ANC. Several factors  
55 associated with quality ANC were identified: age, region, maternal education, health-seeking  
56 decision-making, access to media (TV), time to the health facility, ANC visits, and ANC providers  
57 (doctor and nurse/midwife/clinical officer). Maternal health improvement programs should  
58 prioritize promoting access to education for girls. Additionally, interventions should focus on  
59 promoting shared decision-making and autonomy in healthcare-seeking behaviors among pregnant

60 women and their partners, increasing access to care provided by skilled health workers, and  
61 addressing regional disparities in healthcare delivery.

62 **Keywords: Quality, Antenatal Care, Kenya, Women, factors, determinants, association**

## 63 **Introduction**

64 Quality Antenatal care (ANC) encompasses assessments and treatments provided by licensed  
65 medical practitioners to pregnant adolescent girls and women to maintain the health of the mother  
66 and child (Akter et al., 2023; Kare, Gujo, & Yote, 2021). The absence of quality ANC can have  
67 severe consequences, which lead to increased risks of maternal mortality and morbidity, as well as  
68 adverse outcomes for the newborn, including stillbirth, low birth weight, and preterm birth (World  
69 Health Organization, 2019). Quality ANC is paramount in averting maternal mortality by  
70 addressing pregnancy-related complications, emphasizing its significance in improving maternal  
71 health outcomes worldwide (Modibia, 2020; Charles Wembonyama Mpoy, 2022; Ajibola Idowu,  
72 2022).

73 In sub-Saharan Africa, where maternal mortality rates are highest, ANC coverage remains low,  
74 with only 65% of pregnant women accessing ANC services and information about the quality of  
75 ANC remains scanty (WHO, 2019). However, the quality of ANC is suboptimal in some of these  
76 countries with Ethiopia having a prevalence of 31.3%, Uganda at 61.4%, and Nigeria at 45%  
77 (Modibia 2020, Towongo et al., 2023 & Ajobola Idowu 2022).

78 Factors influencing the quality of ANC span socio-economic, demographic, obstetric, antenatal,  
79 and facility-related domains (Tuncalp et al., 2016; Pell et al., 2016; Say et al., 2014). Numerous  
80 influencing factors of ANC quality, include age, socio-economic status, education level, partner  
81 support, urban residence, media exposure, facility choice, and ANC visit frequency, among others  
82 (Smith et al., 2020; Garcia et al., 2021; Johnson et al., 2019; Lee & Kim, 2023; Wang et al., 2022;

83 Gupta & Sharma, 2023; Nguyen et al., 2020). Moreover, early initiation of ANC visits, adherence  
84 to the recommended visits, and the category of the ANC health providers are linked to higher ANC  
85 quality (Ijeoma Nkem Okedo-Alex, 2019; Afulani, 2015).

86 In Kenya, the maternal mortality rate stands at approximately 342 deaths per 100,000 live births,  
87 and the newborn mortality rate is about 19 deaths per 1,000 live births, indicating a significant  
88 maternal and child health challenge (UNICEF 2023). In Kenya, the Ministry of Health has made  
89 efforts to improve ANC coverage and quality through various initiatives, including the  
90 implementation of ANC guidelines, training of healthcare providers, and community sensitization  
91 programs (Ministry of Health Kenya, 2021). However, the prevalence of quality ANC, as defined  
92 by adherence to ANC guidelines and the provision of comprehensive care, remains unclear and  
93 may vary across facilities and regions in Kenya (Ministry of Health Kenya, 2021).

94 Several studies in Kenya examined the subnational disparities in antenatal care utilization and  
95 factors influencing the utilization of focused antenatal care services (Wairoto et al., 2020 &  
96 Chorong et al., 2016). These studies, however, did not provide a thorough understanding of how  
97 these parameters interact and affect the quality of ANC usage, at a national level. Additionally,  
98 given the high maternal and newborn mortality rates, gaps in the quality of ANC services received  
99 by women during their pregnancies, may still exist.

100 Therefore, to shed light on the prevalence and factors that influence the quality of ANC services  
101 in Kenya, we used data from the Kenya Demographic Health Survey conducted in 2022. This  
102 study may inform interventions to enhance ANC service delivery and promote positive maternal  
103 health outcomes in sub-Saharan Africa.

104

## 105 **Methods**

### 106 **Sampling design, Data collection, and Source**

107 Data from the 2022 Kenya Demographic and Health Survey (KDHS), which used a two-stage  
108 stratified sampling design, was used in this study. The first stage involved selecting 1692  
109 enumeration areas (EAs) or clusters from a master sample frame of 129,067 EAs from the 2019  
110 Kenya population and housing census using equal probability with independent selection(Kenya  
111 National Bureau of Statistics, 2022). To generate a sampling frame to choose 25 homes in each  
112 cluster, the second stage involved listing houses. However, if a cluster's size was less than 25,  
113 every household in it was sampled. The survey was conducted in over 1691 clusters. The training  
114 of data collectors and pretesting of the study instruments were conducted by the Inner-City Fund  
115 (ICF), while data was collected between February and July 2022. Interviews were conducted in  
116 Swahili or English with all women aged 15 to 49 years who were regular members of the chosen  
117 households or who had spent the night in the household before the survey. 11,863 women who  
118 were either pregnant or had given birth during the previous five years were included in the study  
119 out of the 32,156 women who completed the survey. Authorization to use the dataset was obtained  
120 from the MEASURE DHS website (<https://www.dhsprogram.com/data/available-datasets.cfm>).  
121 Even though the dataset had numerous variables, only those that were applicable to our study were  
122 included in the analysis.

### 123 **Study variables**

#### 124 **Dependent/outcomes**

125 The quality of ANC was the study's main outcome variable. The quality of ANC, a composite  
126 variable, was created by combining several binary (yes or no) questions about the mother's receipt

127 of certain services during ANC. The services included blood and urine sample collection, blood  
128 pressure checks, receiving information about danger signs of pregnancy (e.g., bleeding), fetal  
129 heartbeat monitoring, breastfeeding counseling, dietary counseling, and the provision of iron  
130 supplements (or purchase). If participants obtained all eight ANC services (Yes), it indicated that  
131 they had received quality ANC; and vice versa if one skipped one (No) (Atinga & Baku, 2013;  
132 Mpoy et al., 2022; Tadesse Berehe & Modibia, 2020).

### 133 **Independent variables**

134 The three categories of covariates considered in the analysis were sociodemographic, obstetric and  
135 prenatal-related, and health facility-related, based on the literature and the data available in KDHS  
136 (Atinga & Baku, 2013; Mpoy et al., 2022; Tadesse Berehe & Modibia, 2020). Several  
137 sociodemographic parameters were considered and incorporated into the analysis. These variables  
138 included the following: education levels of the mother and husband (primary, secondary, or  
139 tertiary), age in years (15–19, 20–34, 35–49), wealth index in five classes (poorest to richest), place  
140 of residence (rural or urban), marital status (single or married), and religion (Christian, Muslim,  
141 or others). Region was categorized into Kenya's eight provinces— Nyanza, Western, Eastern,  
142 Coast, Northeastern, Central, Rift Valley, and Nairobi. The size of the household ( $\leq 4$  or  $\geq 5$ ) was  
143 used to measure family composition. Two proxy variables were used to assess maternal autonomy:  
144 who heads the household (female or male) and who makes healthcare-seeking decisions for the  
145 participant (partner, self, or jointly with another person/partner, or others). The study also  
146 considered phone ownership and exposure (yes or no) to mass media, as having access to  
147 newspapers, radio, television, and the Internet. The principal component analysis was also used to  
148 compute the wealth index from data on household asset ownership (Kenya National Bureau of  
149 Statistics, 2022).

150 In addition, six antenatal and obstetric factors were analyzed, including whether or not the woman  
151 is currently pregnant, whether or not she has received information about antenatal care from a  
152 community health worker, parity ( $\leq 2$ , 3–4,  $\geq 5$ ), whether or not she has had antenatal visits ( $\leq 3$ , or  
153  $\geq 4$ ), when she had her first ANC visit in months (0–3, 4–6, 7–9), and whether or not the woman  
154 was currently pregnant (Kenya National Bureau of Statistics, 2022).

155  
156 The analysis also included five variables that were associated with the location where ANC was  
157 received. The specific place of the ANC (clinics, faith-based organization (FBO), Non-  
158 governmental Organizations (NGO), private, or public health facilities) and the people who  
159 evaluated the mother during the ANC (midwife, doctor, clinical officer, nurse, and others) were  
160 among these variables. As a proxy measure of access to the health facility, the number of minutes  
161 spent to access the health facility of birth ( $\leq 30$ , 31–60,  $\geq 61$ ) was included in the study. One  
162 additional proxy measure for participant familiarity with the healthcare facility was whether or not  
163 they had ever taken contraceptives (Kenya National Bureau of Statistics, 2022).

## 164 **Statistical analysis**

165 Data was cleaned and dummy variables were constructed before analysis. For each categorical  
166 variable, descriptive statistics such as frequencies were calculated at the univariate level. We  
167 employed univariate logistic regression to identify independent variables associated with the  
168 quality of ANC. Simple multivariate logistic regression was then used to identify the variables  
169 associated with the quality of ANC while controlling for other variables. All variables with P-  
170 values less than 0.05 were included in multivariate analysis and 95% confidence intervals were  
171 provided for all odd ratios of variables. The data was analyzed using the complex samples package

172 in SPSS (V20), which assisted in taking into consideration the complicated sample design present  
173 in DHS data. According to Croft, Marshall, & Allen (2018) and Zou, Lloyd, & Baumbusch (2020),  
174 the complex sample package offers reliable parameter estimations since it takes into consideration  
175 weighting, sample stratification, and clustering that happened throughout the study participant  
176 sampling process. Furthermore, DHS sample weights were imposed on all computed frequencies  
177 to mitigate the effects of unequal probability sampling in various strata and guarantee the  
178 representativeness of the study outcomes (Croft, Marshall, & Allen, 2018; Zou, Lloyd, &  
179 Baumbusch, 2020). Using a variance inflation factor (VIF) of less than 10 as a cutoff, multi-  
180 collinearity was also evaluated among all the predictor variables in the model (Croft et al., 2018;  
181 Zou et al., 2020). All the predictors fell below the threshold.

## 182 **Ethical consideration**

183 The Institutional Review Board of the Inner-City Fund (ICF) granted ethical approval for the 2022  
184 KDHS. Whereas the Kenya National Bureau of Statistics carried out the study in collaboration  
185 with other development partners. Since this study is based on secondary data from the KDHS that  
186 is publicly available, no ethical approval was required for its analysis, however, MEASURE DHS  
187 provided authorization to use the KDHS datasets ([https://www.dhsprogram.com/data/available-](https://www.dhsprogram.com/data/available-datasets.cfm)  
188 [datasets.cfm](https://www.dhsprogram.com/data/available-datasets.cfm)). Both from human participants and from legally appointed representatives of minor  
189 participants, written informed consent was acquired.

## 190 **Results**

### 191 **Demographic characteristics of the study participants**

192 In total, 11,863 women who were pregnant or had given birth within the five years before the  
193 survey were included in this analysis (Table 1). The majority identified themselves as being from



194 the Central, Eastern, Rift Valley, Nyanza, and Nairobi provinces (76.7%), were between the ages  
195 of 20 and 34 (74.4%), and 61.4 % lived in rural areas. The majority of participants were married  
196 (80.2%), had only completed their primary (or none) education (44.8%), and identified as  
197 Christians (88.5%). Fifty-seven percent (57.3%) were employed, and nearly forty-four percent  
198 (43.9%) belonged to the richest quintiles. Furthermore, 91% of the participants' husbands were  
199 employed and the majority had at least a secondary education (55.9%). The majority made  
200 decisions to seek health care services jointly with their partner or another person (44.9%), and they  
201 lived in male-headed households (71.5%), with their partners (83.2%), and with more than five  
202 household members (79%). A significant proportion of the participants were exposed to  
203 mainstream media, which included newspapers (17.2%), television (38.4%), the internet (47.9%),  
204 and radio (74.3%). Furthermore, 81.1 % of the participants were mobile phone owners. Although  
205 94% were not pregnant, most participants (91.2%) wanted/desired to have their most recent  
206 pregnancy and had given birth to utmost two children or had utmost two children currently alive  
207 (53.9%).

208 The majority (60.1%) had attended their first prenatal appointment in the second trimester, and  
209 67.2% had attended at least four antenatal appointments overall from public (83.4%) and private  
210 (15.7%) healthcare facilities. Most had received ANC from doctors (46.7%) and midwives/  
211 nurses/clinical officers (68.7%). Merely 1.2% of the mothers reported learning about ANC from a  
212 community health professional. Furthermore, most mothers had used contraceptives (58.9%) and  
213 had walked (67.7%) to health facilities for ANC, for a maximum travel time of 30 minutes (73.1%).

214

215

216

217 **Table 1: Demographic characteristics of the study participants**

| Variable                  | n (weighted %) |
|---------------------------|----------------|
| <b>Age (years)</b>        |                |
| 35-49                     | 2253 (19)      |
| 20-34                     | 8825(74.4)     |
| 15-19                     | 785 (6.6)      |
| <b>Region/Province</b>    |                |
| Coast                     | 1107 (9.3)     |
| Nairobi                   | 1371 (11.6)    |
| Rift Valley               | 3605 (30.4)    |
| Northeastern              | 406 (3.4)      |
| Western                   | 1253 (10.6)    |
| Nyanza                    | 1406 (11.8)    |
| Eastern                   | 1336 (11.3)    |
| Central                   | 1380 (11.6)    |
| <b>Mother's education</b> |                |
| Tertiary                  | 2321 (19.6)    |
| Secondary                 | 4231 (35.7)    |
| None/primary              | 5311 (44.8)    |
| <b>Husband education</b>  |                |
| Tertiary                  | 2329 (24.5)    |
| Secondary                 | 2984 (31.4)    |
| None/primary              | 4206 (44.2)    |
| <b>Religion</b>           |                |
| Muslims                   | 1120 (9.7)     |
| Christians                | 10220 (88.5)   |
| Others                    | 209 (1.8)      |
| <b>Residence</b>          |                |
| Rural                     | 7289 (61.4)    |
| Urban                     | 4574 (38.6)    |
| <b>Wealth index</b>       |                |
| Richest                   | 2695 (22.7)    |
| Richer                    | 2510 (21.2)    |
| Middle                    | 2074 (17.5)    |
| Poorer                    | 2062 (17.4)    |
| Poorest                   | 2523 (21.3)    |
| <b>Marital status</b>     |                |

|                                                |              |
|------------------------------------------------|--------------|
| Married/in a relationship                      | 9519 (80.2)  |
| Unmarried/ Not in a relationship               | 2,344 (19.8) |
| <b>Mother's Working status</b>                 |              |
| Not working                                    | 5063 (42.7)  |
| Working                                        | 6791 (57.3)  |
| <b>Husband's working status</b>                |              |
| Not working                                    | 858 (9)      |
| Working                                        | 8632 (91)    |
| <b>Sex of household head</b>                   |              |
| Female                                         | 3380 (28.5)  |
| Male                                           | 8483 (71.5)  |
| <b>Household size</b>                          |              |
| ≥5                                             | 9370 (79)    |
| ≤4                                             | 2493 (21)    |
| <b>Health seeking decision making</b>          |              |
| Joint                                          | 4279 (44.9)  |
| Partner                                        | 1590 (16.7)  |
| Self                                           | 3618 (38.5)  |
| Others                                         | 32 (0.3)     |
| <b>Media access (TV, Radio, and Newspaper)</b> |              |
| Yes                                            | 1451 (12.2)  |
| No                                             | 10412 (87.8) |
| <b>Telephone</b>                               |              |
| Yes                                            | 9626 (81.1)  |
| No                                             | 2237 (18.9)  |
| <b>Internet use</b>                            |              |
| Yes                                            | 5684 (47.9)  |
| No                                             | 6179 (52.1)  |
| <b>Parity</b>                                  |              |
| ≤2                                             | 6395 (53.9)  |
| 3-4                                            | 3360 (28.3)  |
| ≥5                                             | 2108 (17.8)  |
| <b>Currently pregnant</b>                      |              |
| Yes                                            | 711 (6)      |
| No                                             | 11152 (94)   |
| <b>Pregnancy wanted</b>                        |              |
| Yes                                            | 10823 (91.2) |
| No                                             | 1041 (8.8)   |
| <b>ANC Visits</b>                              |              |
| ≥4                                             | 6472 (67.2)  |

|                                                                           |             |
|---------------------------------------------------------------------------|-------------|
| ≤3                                                                        | 3157 (32.8) |
| <b>Timing of first ANC visit</b>                                          |             |
| Third trimester                                                           | 841 (8.9)   |
| Second trimester                                                          | 5671 (60.1) |
| First trimester                                                           | 2920 (31)   |
| <b>Place of ANC</b>                                                       |             |
| Public health facility                                                    | 7866 (80.5) |
| Private health facility                                                   | 1477 (15.1) |
| Faith-based organization                                                  | 379 (3.9)   |
| Non-governmental organization                                             | 44 (0.5)    |
| <b>ANC provider</b>                                                       |             |
| Doctor                                                                    | 4494 (39.8) |
| Nurse/midwife/clinical officer                                            | 6618 (58.6) |
| Others                                                                    | 191 (1.6)   |
| <b>Time to health facility (minutes)</b>                                  |             |
| ≥61                                                                       | 496 (8)     |
| 31-60                                                                     | 1168 (18.9) |
| ≤30                                                                       | 4515 (73.1) |
| <b>Received ANC service or information from a community health worker</b> |             |
| No                                                                        | 6103 (98.8) |
| Yes                                                                       | 76 (1.2)    |
| <b>Contraceptive use</b>                                                  |             |
| Yes                                                                       | 6987 (58.9) |
| No                                                                        | 4876 (41.1) |

218 Unmarried= single/ divorced/widowed/separated

## 219 **Quality of Antenatal Care**

220 Overall, 61.2% of the study participants received quality antenatal care (**Table 2**). Among the most  
 221 used ANC services, 98.2% of the participants had their blood pressure taken, followed by 97.7 %  
 222 of the participants whose fetal heartbeat was monitored, and 97.1% and 95.9% had their blood and  
 223 urine samples taken off, respectively. Meanwhile, 92.2% of the participants also received iron  
 224 tablets. On the other hand, fewer participants received nutritional counseling (84.4%),  
 225 breastfeeding counseling (82.4%) and counseling about the danger signs of pregnancy (77.0%).

226

227

**Table 2: Component of antenatal care received by study participants.**

| Variable                                       | n (weighted %), 95%CI   |
|------------------------------------------------|-------------------------|
| <b>The overall quality of Antenatal care</b>   | <b>61.2 (59.7-62.6)</b> |
| Blood pressure taken                           | 98.2 (97.9-98.4)        |
| Urine samples taken                            | 95.9 (95.4-96.4)        |
| Blood samples taken                            | 97.1 (96.7-97.5)        |
| Fetal heartbeat monitored                      | 97.7 (97.4-98.1)        |
| Nutritional counselling                        | 84.4 (83.5-85.4)        |
| Breastfeeding counselling                      | 82.4 (81.3-83.4)        |
| Advise on danger signs of pregnancy (bleeding) | 77.0 (75.7-78.3)        |
| Given/bought iron tablets                      | 92.2 (91.4-92.8)        |

228

229

### 230 **Factors associated with the quality of antenatal care.**

231 The factors associated with the quality of antenatal care in univariate and multivariate logistic  
232 regression analysis are summarized in **Table 3**. Older mothers (aged 20–34) had a 1.82 (95%CI:  
233 1.15-2.87) times higher likelihood of receiving quality ANC when compared with younger  
234 mothers (15–19 years old). Participating mothers who had attended 4 or more ANC visits were  
235 1.42 (95%CI: 1.14-1.79) times more likely to receive quality ANC than those who attended 3 or  
236 less visits. Comparing participants with and without media access, those with media access were  
237 1.47 (95%CI: 1.06-2.03) times more likely to receive quality ANC. Furthermore, the likelihood of  
238 receiving quality ANC was 1.93 (95%CI: 1.21-3.08) and 1.44 (95%CI: 1.01-2.06) times higher for  
239 participants in the richest and richer quintiles, respectively, than for those in the poorest quintile.

240 On the contrary, the odds of receiving quality ANC were 0.25 (95%CI: 0.15-0.31) to 0.64 (95%CI:  
 241 0.44-0.92) times lower for participating mothers from all other Kenyan regions than for those from  
 242 the coastal region. Participants whose husbands or partners made decisions for them to seek  
 243 healthcare, compared with those who made decisions independently were 0.74 (95%CI: 0.58-0.95)  
 244 times less likely to receive quality antenatal care.

245 **Table 3: Factors associated with the quality of antenatal care among women aged 15-49**  
 246 **years.**

| Variable               | Quality ANC    |                |   | COR<br>(95%CI)               | P-value | AOR<br>(95%CI)               | P-value |
|------------------------|----------------|----------------|---|------------------------------|---------|------------------------------|---------|
|                        | Yes<br>(%)     | No<br>(%)      | n |                              |         |                              |         |
| <b>Age (years)</b>     |                |                |   |                              | <0.001  |                              | 0.021   |
| 15-19                  | 313<br>(3.3)   | 388<br>(4.0)   | 1 |                              |         | 1                            |         |
| 20-34                  | 4529<br>(47.2) | 2650<br>(27.6) |   | <b>2.12 (1.75-<br/>2.57)</b> |         | <b>1.82 (1.15-<br/>2.87)</b> |         |
| 35-49                  | 1035<br>(10.8) | 691<br>(7.2)   |   | 1.86(1.49-<br>2.33)          |         | 1.58 (0.94-<br>2.67)         |         |
| <b>Residence</b>       |                |                |   |                              | <0.001  |                              | 0.897   |
| Rural                  | 3250<br>(35.4) | 2605<br>(27.1) | 1 |                              |         | 1                            |         |
| Urban                  | 2479<br>(27.5) | 1123<br>(11.7) |   | <b>1.69 (1.47-<br/>1.95)</b> |         | 1.017 (0.79-<br>1.31)        |         |
| <b>Region/Province</b> |                |                |   |                              | <0.001  |                              | <0.001  |
| Coast                  | 602<br>(6.3)   | 251<br>(2.6)   | 1 |                              |         | 1                            |         |
| Northeastern           | 81<br>(0.8)    | 204<br>(2.1)   |   | <b>0.17 (0.12-<br/>0.23)</b> |         | <b>0.25 (0.15-<br/>0.31)</b> |         |
| Eastern                | 731<br>(7.6)   | 417<br>(4.3)   |   | <b>0.73 (0.56-<br/>0.95)</b> |         | <b>0.60 (0.41-<br/>0.89)</b> |         |
| Central                | 822<br>(8.6)   | 323<br>(3.4)   |   | <b>1.06 (0.78-<br/>1.44)</b> |         | <b>0.62 (0.41-<br/>0.94)</b> |         |
| Rift Valley            | 1587<br>(16.5) | 1347<br>(14.0) |   | <b>0.49 (0.39-<br/>0.61)</b> |         | <b>0.41(0.30-<br/>0.59)</b>  |         |
| Western                | 628<br>(6.5)   | 367<br>(3.8)   |   | <b>0.71 (0.55-<br/>0.93)</b> |         | <b>0.64 (0.44-<br/>0.92)</b> |         |
| Nyanza                 | 682<br>(7.1)   | 486<br>(5.1)   |   | <b>0.58 (0.49-<br/>0.75)</b> |         | <b>0.51 (0.36-<br/>0.72)</b> |         |
| Nairobi                | 743<br>(7.7)   | 333<br>(3.5)   |   | <b>0.93 (0.64-<br/>1.36)</b> |         | <b>0.51 (0.29-<br/>0.87)</b> |         |
| <b>Education</b>       |                |                |   |                              | <0.001  |                              | 0.098   |
| None/primary           | 2293<br>(23.9) | 1976<br>(20.6) | 1 |                              |         | 1                            |         |

|                               |                        |                |                              |        |                              |       |
|-------------------------------|------------------------|----------------|------------------------------|--------|------------------------------|-------|
| Secondary                     | 2258<br>(23.5)         | 1246<br>(13.0) | 1.56 (1.37-<br>1.78)         |        | 1.30 (0.99-<br>1.69)         |       |
| Tertiary                      | 1326<br>(13.8)         | 507<br>(5.3)   | <b>2.25 (1.85-<br/>2.75)</b> |        | 1.52 (0.99-<br>2.32)         |       |
| <b>Religion</b>               |                        |                |                              | 0.270  |                              |       |
| Christians                    | 5117<br>(54.7)         | 3257<br>(34.8) | 1.31 (0.91-<br>1.89)         |        | -                            |       |
| Muslims                       | 480<br>(5.1)           | 336<br>(3.6)   | 1.19 (0.79-<br>1.78)         |        | -                            |       |
| Others                        | 88<br>(0.9)            | 73 (0.8)       | 1                            |        | -                            |       |
| <b>Marital status</b>         |                        |                |                              | 0.071  |                              |       |
| Married                       | 4681.<br>912<br>(48.7) | 2889<br>(30.1) | 1.14 (0.99-<br>1.31)         |        |                              |       |
| Unmarried                     | 1195<br>(12.4)         | 839<br>(8.7)   | 1                            |        |                              |       |
| <b>Wealth index</b>           |                        |                |                              | <0.001 |                              | 0.001 |
| Poorest                       | 994<br>(10.4)          | 1071<br>(11.1) | 1                            |        | 1                            |       |
| Poorer                        | 973<br>(10.1)          | 722<br>(7.5)   | <b>1.45 (1.24-<br/>1.69)</b> |        | 1.19 (0.92-<br>1.53)         |       |
| Middle                        | 1043<br>(10.9)         | 662<br>(6.9)   | <b>1.69 (1.44-<br/>1.99)</b> |        | 1.28 (0.97-<br>1.67)         |       |
| Richer                        | 1343<br>(14.0)         | 689<br>(7.2)   | <b>2.09 (1.75-<br/>2.52)</b> |        | <b>1.44 (1.01-<br/>2.06)</b> |       |
| Richest                       | 1523<br>(15.9)         | 584<br>(6.1)   | <b>2.81 (2.28-<br/>3.45)</b> |        | <b>1.93 (1.21-<br/>3.08)</b> |       |
| <b>Working status</b>         |                        |                |                              | 0.071  |                              |       |
| Not working                   | 2463<br>(25.7)         | 1656<br>(17.3) | 1                            |        | -                            |       |
| Working                       | 3411<br>(35.5)         | 2067<br>(21.5) | 1.11 (0.99-<br>1.24)         |        | -                            |       |
| <b>Husband Education</b>      |                        |                |                              | <0.001 |                              | 0.635 |
| None/primary                  | 1875<br>(24.8)         | 1479<br>(19.5) | 1                            |        | 1                            |       |
| Secondary                     | 1532<br>(20.2)         | 879<br>(11.6)  | <b>1.38 (1.19-<br/>1.58)</b> |        | 0.97 (0.77-<br>1.22)         |       |
| Tertiary                      | 1275<br>(16.8)         | 530<br>(7.0)   | <b>1.89 (1.57-<br/>2.29)</b> |        | 0.85 (0.61-<br>0.19)         |       |
| <b>Husband Working status</b> |                        |                |                              | <0.001 |                              | 0.153 |
| Not working                   | 334<br>(4.4)           | 332<br>(4.4)   | 1                            |        | 1                            |       |
| Working                       | 4331<br>(57.4)         | 2549<br>(33.8) | <b>1.69 (1.39-<br/>2.04)</b> |        | 0.82 (0.62-<br>1.08)         |       |
| <b>Sex of Household head</b>  |                        |                |                              | 0.754  |                              |       |
| Male                          | 4178<br>(43.5)         | 2635<br>(27.4) | 1                            |        | -                            |       |
| Female                        | 1699<br>(17.7)         | 1093<br>(11.4) | 0.98 (0.87-<br>1.11)         |        | -                            |       |

|                                                |                |                |                         |        |                         |       |
|------------------------------------------------|----------------|----------------|-------------------------|--------|-------------------------|-------|
| <b>Health seeking decision making</b>          |                |                |                         | <0.001 |                         | 0.049 |
| Self                                           | 1797<br>(23.7) | 1068<br>(14.1) | 1                       |        | 1                       |       |
| Partner                                        | 644<br>(8.5)   | 602<br>(8.0)   | <b>0.64 (0.54-0.75)</b> |        | <b>0.74 (0.58-0.95)</b> |       |
| Joint                                          | 2229<br>(29.4) | 1204<br>(15.9) | 1.10 (0.96-1.26)        |        | 1.02 (0.84-1.25)        |       |
| Others                                         | 12<br>(0.2)    | 16 (0.2)       | 0.44 (0.15-1.29)        |        | 0.49 (0.11-2.22)        |       |
| <b>Household size</b>                          |                |                |                         | <0.001 |                         | 0.377 |
| ≤4                                             | 1322<br>(13.8) | 625<br>(6.5)   | <b>1</b>                |        | 1                       |       |
| ≥5                                             | 4554<br>(47.4) | 3103<br>(32.3) | <b>0.69 (0.59-0.81)</b> |        | 0.89 (0.71-1.14)        |       |
| <b>Media access (TV, Radio, and Newspaper)</b> |                |                |                         | <0.001 |                         | 0.022 |
| Yes                                            | 824<br>(8.6)   | 319<br>(3.3)   | <b>1.74 (1.39-2.17)</b> |        | <b>1.47 (1.06-2.03)</b> |       |
| No                                             | 5052<br>(52.6) | 3409<br>(35.5) | <b>1</b>                |        | 1                       |       |
| <b>Internet use</b>                            |                |                |                         | <0.001 |                         | 0.282 |
| No                                             | 2829<br>(29.5) | 2262<br>(23.6) | 1                       |        | 1                       |       |
| Yes                                            | 3048<br>(31.7) | 1466<br>(15.3) | <b>1.66 (1.48-1.87)</b> |        | 0.87 (0.68-1.12)        |       |
| <b>Telephone</b>                               |                |                |                         | <0.001 |                         | 0.845 |
| No                                             | 993<br>(10.3)  | 872<br>(9.1)   | 1                       |        | 1                       |       |
| Yes                                            | 4883<br>(50.8) | 2856<br>(29.7) | <b>1.50 (1.34-1.69)</b> |        | 0.98 (0.79-1.22)        |       |
| <b>Parity</b>                                  |                |                |                         | <0.001 |                         | 0.478 |
| ≤2                                             | 3274<br>(34.1) | 1949<br>(20.3) | 1                       |        | 1                       |       |
| 3-4                                            | 1733<br>(18.0) | 997<br>(10.4)  | <b>1.04 (0.92-1.18)</b> |        | 1.06 (0.84-1.34)        |       |
| ≥5                                             | 870<br>(9.1)   | 782<br>(8.1)   | <b>0.66 (0.57-0.78)</b> |        | 1.21 (0.89-1.64)        |       |
| <b>Currently pregnant</b>                      |                |                |                         | 0.121  |                         |       |
| No                                             | 5580<br>(58.1) | 3509<br>(36.5) | 1                       |        | -                       |       |
| Yes                                            | 297<br>(3.1)   | 219<br>(2.3)   | 0.85 (0.69-1.04)        |        | -                       |       |
| <b>Pregnancy wanted</b>                        |                |                |                         | 0.117  |                         |       |
| No                                             | 502<br>(5.2)   | 364<br>(3.8)   | 1                       |        | -                       |       |
| Yes                                            | 5375<br>(56)   | 3364<br>(35)   | 1.16(0.96-1.40)         |        | -                       |       |
| <b>Contraceptive use</b>                       |                |                |                         | <0.001 |                         | 0.459 |
| No                                             | 2058<br>(21.4) | 1620<br>(16.9) | 1                       |        | 1                       |       |



|                                                    |                |                |                         |        |                         |       |
|----------------------------------------------------|----------------|----------------|-------------------------|--------|-------------------------|-------|
| Yes                                                | 3818<br>(39.8) | 2108<br>(22.0) | <b>1.43 (1.28-1.59)</b> |        | 1.08<br>(0.88-1.32)     |       |
| <b>Time to health facility (minutes)</b>           |                |                |                         | <0.001 |                         | 0.068 |
| ≤30                                                | 2258<br>(45.5) | 1337<br>(26.9) | 1                       |        | 1                       |       |
| 31-60                                              | 585<br>(11.8)  | 376<br>(7.6)   | <b>0.92 (0.77-1.10)</b> |        | 1.24<br>(1.00-1.52)     |       |
| ≥61                                                | 205<br>(4.1)   | 203<br>(4.1)   | <b>0.60 (0.47-0.77)</b> |        | 0.92<br>(0.69-1.22)     |       |
| <b>ANC Visits</b>                                  |                |                |                         | <0.001 |                         | 0.002 |
| ≤3                                                 | 1572<br>(16.4) | 1561<br>(16.3) | 1                       |        | 1                       |       |
| ≥4                                                 | 4305<br>(44.8) | 2167<br>(22.6) | <b>1.97 (1.75-2.22)</b> |        | <b>1.42 (1.14-1.79)</b> |       |
| <b>Timing of first ANC visit</b>                   |                |                |                         | <0.001 |                         | 0.386 |
| 1 <sup>st</sup> trimester                          | 2003<br>(21.2) | 917<br>(9.7)   | 1                       |        | 1                       |       |
| 2 <sup>nd</sup> trimester                          | 3458<br>(36.7) | 2213<br>(23.5) | <b>0.72 (0.63-0.82)</b> |        | 0.94<br>(0.76-1.17)     |       |
| 3 <sup>rd</sup> trimester                          | 416<br>(4.4)   | 425<br>(4.5)   | <b>0.45 (0.37-0.55)</b> |        | 0.77<br>(0.52-1.12)     |       |
| <b>Place of ANC</b>                                |                |                |                         |        |                         |       |
| Public health facility                             |                |                |                         | 0.266  |                         |       |
| No                                                 | 1014<br>(10.7) | 552<br>(5.8)   | 1                       |        | -                       |       |
| Yes                                                | 4863<br>(51.6) | 3003<br>(31.8) | 0.88 (0.71-1.10)        |        | -                       |       |
| Private health facility                            |                |                |                         | 0.322  |                         |       |
| No                                                 | 4920<br>(52.2) | 3035<br>(32.2) | 1                       |        | -                       |       |
| Yes                                                | 956<br>(10.1)  | 520<br>(5.5)   | 1.13 (0.88-1.46)        |        | -                       |       |
| Faith-based organization                           |                |                |                         | 0.796  |                         |       |
| No                                                 | 5637<br>(59.8) | 3416<br>(36.2) | 1                       |        | -                       |       |
| Yes                                                | 240<br>(2.5)   | 140<br>(1.5)   | 0.34 (0.14-0.86)        |        | -                       |       |
| Non-governmental organization                      |                |                |                         | 0.017  |                         | 0.386 |
| No                                                 | 5861<br>(62.1) | 3527<br>(37.4) | 1                       |        | 1                       |       |
| Yes                                                | 16<br>(0.3)    | 28 (0.8)       | 1.04 (0.77-1.41)        |        | 1.15<br>(0.14-0.94)     |       |
| <b>ANC provider</b>                                |                |                |                         | 0.608  |                         |       |
| Skilled                                            | 5756<br>(59.9) | 3658<br>(38.1) | 1                       |        | -                       |       |
| Unskilled                                          | 121<br>(1.3)   | 70 (0.7)       | 1.09 (0.78-1.51)        |        |                         |       |
| <b>CHW provision of ANC information or service</b> |                |                |                         | 0.611  |                         |       |

|     |                |                |                      |   |
|-----|----------------|----------------|----------------------|---|
| No  | 3011<br>(60.7) | 1895<br>(38.2) | 1                    | - |
| Yes | 37<br>(0.8)    | 20 (0.4)       | 1.18 (0.63-<br>2.19) | - |

247 **Bold**= significant, \* = significant at 0.05, CI= confidence interval, —not evaluated in that model,  
248 Ref.=reference category, CORs= crude odd ratios, AORs=adjusted odds ratios, ANC= antenatal  
249 care, FBO= faith-based organizations, NGO= nongovernmental organization

250

## 251 **Discussion**

252 This study assessed the factors associated with the quality of ANC in Kenya using the 2022  
253 demographic health survey. The overall prevalence of quality ANC among study participants was  
254 found to be 61.2%. This is higher than the prevalence of the quality of ANC from Ethiopia at  
255 31.38% (Tadesse Berehe & Modibia, 2020), Rwanda at 13.1% (Sserwanja et al., 2022) and Nigeria  
256 at 45% (Idowu, Israel, & Akande, 2022). The difference between our study and the literature may  
257 be attributed to the differences in health policies, health facility standards, and ANC  
258 implementation challenges in various countries (Idowu et al., 2022) Ajibola Idowu, 2022 & MoH  
259 Kenya 2021). Additionally, differential efforts and resources put into maternal health services, as  
260 well as differences in socio-demographics across countries may explain the differences in findings  
261 between this study and the literature (Zhao et al., 2023, Kare, 2021; Tuncalp et al., 2016).

262 In the multivariate analysis, age was significantly associated with the quality of ANC. Women  
263 aged 20-34 years were more likely to receive quality ANC than younger women aged 15-19 years.  
264 This finding is consistent with studies conducted in Bangladesh and sub-Saharan Africa, which  
265 reported that younger women were less likely to receive quality ANC (Akter, 2023 & Garcia et  
266 al., 2021). Additionally, women aged 20-34 years are more likely to have better knowledge and  
267 understanding of the benefits of quality ANC due to increased awareness and proactive

268 engagement with the healthcare system, increasing their demand and use for such services (Smith  
269 et al., 2020).

270 In terms of region, there were significant variations in the quality of ANC across different  
271 provinces in Kenya. For example, the Rift Valley region had lower odds of receiving quality ANC,  
272 while the Northeastern region had the lowest odds compared to the Coastal region. The coastal  
273 region is in proximity to urban centers and tourist areas of Kenya with better healthcare facilities  
274 (Phiri et al. 2014). The findings may indicate the presence of regional differences and variations  
275 in the provision of ANC, with some regions facing challenges such as shortages of skilled  
276 healthcare providers, inadequate infrastructure, and limited access to essential resources  
277 (Mwangome et al., 2020). These regional disparities highlight the importance of addressing  
278 geographical inequities in healthcare delivery.

279 The Wealth Index was significantly associated with quality ANC utilization. The richest  
280 participants had higher odds of receiving quality ANC compared to the poorest participants.  
281 Similar studies in Nigeria reported that the wealthiest respondents were more likely to adequately  
282 use ANC (Fagbamigbe et al., 2017& Feng et al., 2021). Richest women do not have the challenges  
283 of accessing the money necessary for transport to health facilities and accessing more sophisticated  
284 healthcare (Fagbamigbe et al., 2017). Empowering Kenyan women through adequate  
285 employment/income generating activities should be paramount in policies targeted at optimizing  
286 quality ANC utilization.

287 Health-seeking decision-making was also associated with quality ANC utilization. Participants  
288 whose partners made decisions for them to seek healthcare were less likely to receive quality ANC  
289 compared with those who had joint decision-making. This finding may be partly explained by a  
290 qualitative study conducted in Malawi which found that most men termed pregnancy and ANC as

291 a women's issue, thus perceiving decision-making around ANC as a low priority (Kennedy  
292 Machira1, 2023). On the other hand, women's autonomy in decision-making has a positive effect  
293 on ANC service use (Awoleye et al., 2018 & Haider et al., 2017). Therefore, it is recommended to  
294 implement interventions that promote shared decision-making and autonomy in healthcare-  
295 seeking behaviors among pregnant women and their partners.

296 Access to media was significantly associated with quality ANC utilization. The findings are similar  
297 to studies in Uganda (Bbaale, 2011) and Bangladesh (Akter et al., 2023) that established a  
298 significant correlation between media exposure and the quality of ANC. This was because media  
299 exposure gave mothers visual and audio access to health-related information, which eventually  
300 improved access to healthcare and demand for ANC services (Ndugga, Namiyonga, & Sebuwufu,  
301 2020; Zhao, Zhang, Xiao, He, & Tang, 2023). We recommend that more reviews are conducted to  
302 establish the most effective media for quality ANC utilization.

303 In this study, the number of ANC visits attended was significantly associated with the quality of  
304 ANC utilization. Women who had attended 4 or more ANC visits were more likely to receive  
305 quality ANC compared with those who had attended less or equal to 3 visits. This finding is similar  
306 to an Ethiopian study by Kare et al. (2021) that found that pregnant women who had visited  
307 hospitals for ANC four or more times had higher odds of having quality ANC. Attending ANC  
308 more than 4 times increases the chances of obtaining multiple ANC services including identifying  
309 complications and risky behaviors during pregnancy and is a very important indicator of quality  
310 ANC as stated by WHO (2016).

## 311 **Limitations and strengths**

312 We utilized the most recent data from the 2022 Kenya Demographic and Health Survey, with a  
313 large sample size and rigorous data collection protocols making the results of our study

314 generalizable to Kenya and sub-Saharan Africa. However, the study is based on retrospective data  
315 provided by the survey respondents, which may be subject to recall bias. In addition, the cross-  
316 sectional design of this study infers association and not causality.

## 317 **Conclusion**

318 The study revealed that 61.2% of the mothers had received quality ANC. The study also reported  
319 several factors associated with quality ANC, age, region, wealth index, health-seeking decision  
320 making, access to media (TV), and ANC visits. It is recommended to implement interventions that  
321 promote shared decision-making and autonomy in healthcare-seeking behaviors among pregnant  
322 women and their partners. The regional disparities highlight the importance of addressing  
323 geographical inequities in healthcare delivery. We recommend that more reviews are conducted to  
324 establish the most effective media for quality ANC utilization.

## 325 **Abbreviations**

|             |                                        |
|-------------|----------------------------------------|
| <b>AOR</b>  | Adjusted Odds Ratio                    |
| <b>ANC</b>  | Antenatal Care                         |
| <b>EA</b>   | Enumeration area                       |
| <b>CI</b>   | Confidence Interval                    |
| <b>COR</b>  | Crude Odds Ratio                       |
| <b>DHS</b>  | Demographic Health Survey              |
| <b>KDHS</b> | Kenya Demographic Health Survey        |
| <b>OR</b>   | Odds Ratio                             |
| <b>SPSS</b> | Statistical Package for Social Science |
| <b>VIF</b>  | Variance Inflation Factor              |
| <b>WHO</b>  | World Health Organization              |

326

327

328

## 329 **DECLARATIONS**

### 330 **Acknowledgments**

331 We are grateful that the data used in this investigation were made available by the Demographic  
332 Health Survey program.

### 333 **Funding**

334 There was no funding for this study.

### 335 **Availability of data and materials**

336 The data set used for this study is openly available upon obtaining permission from the MEASURE  
337 DHS website (URL: <https://www.dhsprogram.com/data/available-datasets.cfm>). However,  
338 authors are not authorized to share this data set with the public however anyone interested in the  
339 data set can seek it with written permission from the MEASURE DHS website (URL:  
340 <https://www.dhsprogram.com/data/available-datasets.cfm>).

### 341 **Authors' contributions**

342 **Concept and proposal development:** John Baptist Asiimmwe, Lilian Nuwabaine,

343 **Data analysis:** John Baptist Asiimmwe, Lilian Nuwabaine, Joseph Kawuki, Quraish Sserwanja,  
344 Angella Namulema, Mathius Amperiize, Earnest Amwiine

345 **Writing the original draft:** John Baptist Asiimmwe, Lilian Nuwabaine, Joseph Kawuki, Quraish  
346 Sserwanja, Angella Namulema, Mathius Amperiize, Earnest Amwiine

347 **Writing- review, and editing:** John Baptist Asiimmwe, Lilian Nuwabaine, Joseph Kawuki,  
348 Quraish Sserwanja, Angella Namulema, Mathius Amperiize, Earnest Amwiine

349

### 350 **Ethics approval and consent to participate**

351 The study protocol is carried out following pertinent criteria, and high international ethical  
352 standards are guaranteed during the MEASURE DHS surveys. The ICF Institutional Review Board  
353 assessed and approved the protocol for the 2022 KDHS survey. Both from human participants and  
354 from legally appointed representatives of minor participants, written informed consent was  
355 acquired.

### 356 **Consent for publication**

357 This is not applicable in this study.

### 358 **Competing interests**

359 All the authors declare that they have no competing interests.

### 360 **ORCID**

361 Joseph Kawuki: <https://orcid.org/0000-0002-2440-1111>

362 Lilian Nuwabaine: <https://orcid.org/0000-0003-3255-3876>

363 John Baptist Asiimwe: <https://orcid.org/0000-0003-0681-9204>

364 Quraish Sserwanja: <http://orcid.org/0000-0003-0576-4627>

365

366

367

368

369

370

371 **References**

372 Modibia2, T. T. (2020). Assessment of Quality of Antenatal Care Services and Its Determinant  
373 Factors in Public Health Facilities of Hossana Town, Hadiya Zone, Southern Ethiopia: A  
374 Longitudinal Study. *hindawi*.

375  
376 Akter, E., Hossain, A. T., Rahman, A. E., Ahmed, A., Tahsina, T., Tanwi, T. S., . . . Chowdhury, M. E. (2023).  
377 Levels and determinants of quality antenatal care in Bangladesh: Evidence from the Bangladesh  
378 Demographic and Health Survey. *PLoS One*, *18*(5), e0269767.

379  
380 Atinga, R. A., & Baku, A. A. (2013). Determinants of antenatal care quality in Ghana. *International Journal*  
381 *of Social Economics*, *40*(10), 852-865.

382  
383 Croft, T., Marshall, A., & Allen, C. (2018). Guide to DHS statistics. Rockville: ICF; 2018. In.

384  
385 Idowu, A., Israel, O. K., & Akande, R. O. (2022). Access, perceived quality and uptake of antenatal services  
386 in urban communities of Osun state, Southwest Nigeria. *African Journal of Reproductive Health*,  
387 *26*(12), 78-89.

388  
389 Kare, A. P., Gujo, A. B., & Yote, N. Y. (2021). Quality of antenatal care and associated factors among  
390 pregnant women attending government hospitals in Sidama Region, Southern Ethiopia. *SAGE*  
391 *open medicine*, *9*, 20503121211058055.

392  
393 Kennedy Machira1. (2023). Women's perspectives on quality of maternal health care services in Malawi.  
394 *International Journal of Women's Health*.

395  
396 Kenya National Bureau of Statistics. (2022). Kenya Demographic and Health Survey. Retrieved from  
397 <https://dhsprogram.com/pubs/pdf/PR143/PR143.pdf>

398  
399 Mpoy, C. W., Katembo, B. M., Ndomba, M. M., Mishika, P. L., Missumba, W. K., Mukuku, O., &  
400 Wembonyama, S. O. (2022). Determinants of utilization and quality of antenatal care services in  
401 Lubumbashi, in the Democratic Republic of the Congo. *Global Journal of Medical, Pharmaceutical,*  
402 *and Biomedical Update*, *17*.

403  
404 Ndugga, P., Namiyonga, N. K., & Sebuwufu, D. (2020). Determinants of early postnatal care attendance:  
405 analysis of the 2016 Uganda demographic and health survey. *BMC Pregnancy and Childbirth*,  
406 *20*(1), 1-14.

407  
408 Tadesse Berehe, T., & Modibia, L. M. (2020). Assessment of quality of antenatal care services and its  
409 determinant factors in public health facilities of Hossana Town, Hadiya Zone, Southern Ethiopia:  
410 a longitudinal study. *Advances in Public Health*, *2020*, 1-11.



- 411  
412 World Health Organization. (2019). *Trends in maternal mortality 2000 to 2017: estimates by WHO,*  
413 *UNICEF, UNFPA, World Bank Group and the United Nations Population Division: executive*  
414 *summary*. Retrieved from
- 415 Zhao, S., Zhang, Y., Xiao, A. Y., He, Q., & Tang, K. (2023). Key factors associated with quality of postnatal  
416 care: a pooled analysis of 23 countries. *EclinicalMedicine*, 62.
- 417
- 418 Zou, D., Lloyd, J. E., & Baumbusch, J. L. (2020). Using SPSS to analyze complex survey data: a primer.  
419 *Journal of Modern Applied Statistical Methods*, 18(1), 16.
- 420
- 421 Ajibola Idowu1\*, O. K. (2022). Access, perceived quality and uptake of antenatal services in  
422 urban. *African Journal of Reproductive Health*.
- 423 Towongo, M.F., Ngome, E., Navaneetham, K., & Letamo, G. (2023). A secondary analysis of the  
424 factors associated with women's adequate utilization of antenatal care services during their last  
425 pregnancy in Uganda. *BMC Pregnancy and Childbirth*, 23(692).
- 426 Chorong, D., Okinda, F.M., Kariuki, E.J., Mulewa, E., Ibinda, F., Muhula, S., Kimathi, G., &  
427 Muga, R. (2016). Factors influencing the utilization of focused antenatal care services in Malindi  
428 and Magarini sub-counties of Kilifi county, Kenya. *Pan Afr Med J*, 25(Suppl 2), 14. doi:  
429 10.11604/pamj.supp.2016.25.2.10520
- 430 Wairoto, K.G., Joseph, N.K., Macharia, P.M., & Okir, E.A. (2020). Determinants of subnational  
431 disparities in antenatal care utilization: a spatial analysis of demographic and health survey data in  
432 Kenya. *BMC Health Services Research*, 20(665).
- 433 Sserwanja, Q., Nuwabaine, L., Gatasi, G. *et al.* Factors associated with utilization of quality  
434 antenatal care: a secondary data analysis of Rwandan Demographic Health Survey 2020. *BMC*  
435 *Health Serv Res* 22, 812 (2022). <https://doi.org/10.1186/s12913-022-08169-x>
- 436 UNICEF. (2023). Trends in Estimate of Maternal Mortality Ratio (MMR), Maternal Death, and  
437 Lifetime Risk of Maternal Death, 2000-2020. [Excel Spreadsheet]. Retrieved from  
438 [https://data.unicef.org/wp-content/uploads/2023/02/MMR-maternal-deaths-and-LTR\\_MMEIG-](https://data.unicef.org/wp-content/uploads/2023/02/MMR-maternal-deaths-and-LTR_MMEIG-trends_2000-2020_released-Feb_2023.xlsx)  
439 [trends\\_2000-2020\\_released-Feb\\_2023.xlsx](https://data.unicef.org/wp-content/uploads/2023/02/MMR-maternal-deaths-and-LTR_MMEIG-trends_2000-2020_released-Feb_2023.xlsx)
- 440 Phiri, S. N., Kiserud, T., Kvåle, G., Byskov, J., Evjen-Olsen, B., Michelo, C., Echoka, E., & Fylkesnes, K.  
441 (2014). Factors associated with health facility childbirth in districts of Kenya, Tanzania and Zambia: a  
442 population-based survey. *BMC Pregnancy and Childbirth*, 14(1), 219. [https://doi.org/10.1186/1471-](https://doi.org/10.1186/1471-2393-14-219)  
443 [2393-14-219](https://doi.org/10.1186/1471-2393-14-219)
- 444 Fagbamigbe, A. F., & Idemudia, E. S. (2016). Wealth and antenatal care utilization in Nigeria: Policy  
445 implications. *Journal Name*, Pages 17-37. doi:10.1080/07399332.2016.1225743

- 446 Feng, Y., Ahuru, R. R., Anser, M. K., Osabohien, R., Ahmad, M., & Efebere, A. H. (2021). Household  
447 economic wealth management and antenatal care utilization among business women in the  
448 reproductive-age. *Journal of Reproductive Health*, 25(6), 1-10. doi:10.29063/ajrh2021/v25i6.15
- 449 Awoleye, A.F., Victor, C., & Alawode, O.A. (2018). Women autonomy and maternal healthcare  
450 services utilization among young ever-married women in Nigeria. *International Journal of Nursing  
451 and Midwifery*, 10(6), 62-73. DOI: 10.5897/IJNM2018.0302
- 452 Afulani, P. A. (2015). Rural/Urban and Socioeconomic Differentials in Quality of Antenatal Care  
453 in Ghana. *PLOS ONE*.
- 454 Ajibola Idowu<sup>1\*</sup>, O. K. (2022). Access, perceived quality and uptake of antenatal services in  
455 urban. *African Journal of Reproductive Health*.
- 456 Akter E, Hossain AT, Rahman AE, Ahmed A, Tahsina T, Tanwi TS, et al. (2023) Levels and  
457 determinants of quality antenatal care in  
458 Bangladesh: Evidence from the Bangladesh Demographic and Health Survey. *PLoS ONE* 18(5):  
459 e0269767. [https://doi.org/10.1371/journal.  
460 pone.0269767](https://doi.org/10.1371/journal.pone.0269767)
- 461 Assefa Philipos Kare, A. B. (2021). Quality of antenatal care and associated factors among  
462 pregnant. *sage open medicine*.
- 463 Bbaale, E. (2011). Factors influencing the utilisation of antenatal care content in Uganda.  
464 *australian medial journal*.
- 465 Charles Wembonyama Mpoy<sup>1</sup>, M. M. (2022). Determinants of Utilization and Quality of  
466 Antenatal.
- 467 Zhou H, Wang A, Huang X, Guo S, Yang Y, Martin K, et al. (2019) Quality antenatal care protects  
468 against low birth weight in 42 poor counties of Western China. *PLoS ONE* 14(1): e0210393.  
469 <https://doi.org/10.1371/journal.pone.0210393>  
470
- 471 Ijeoma Nkem Okedo-Alex, 1. I. (2019). Determinants of antenatal care utilisation in sub-Saharan  
472 Africa: a. *BMJ OPEN*.
- 473 Kennedy Machira<sup>1</sup>, 2. (2023). Women's perspectives on quality of maternal health care services  
474 in Malawi. *International Journal of Women's Health*.
- 475 Modibia<sup>2</sup>, T. T. (2020). Assessment of Quality of Antenatal Care Services and Its Determinant  
476 Factors in Public Health Facilities of Hossana Town, Hadiya Zone, Southern Ethiopia: A  
477 Longitudinal Study. *hindawi*.  
478
- 479 [Nketiah-Amponsah, E.](#), [Senadza, B.](#) and [Arthur, E.](#) (2013), "Determinants of utilization of  
480 antenatal care services in developing countries: Recent evidence from Ghana", *African Journal of  
481 Economic and Management Studies*, Vol. 4 No. 1, pp. 58-  
482 73. <https://doi.org/10.1108/20400701311303159>  
483

- 484 Afulani PA (2015) Rural/Urban and Socioeconomic Differentials in Quality of Antenatal Care in  
485 Ghana. PLoS ONE 10(2): e0117996.  
486 doi:10.1371/journal.pone.0117996
- 487 WHO. (2019). TRENDS IN MATERNAL MORTALITY: 2000 TO 2017. Estimates by WHO,  
488 UNICEF, UNFPA, World Bank Group and the United Nations Population Division.
- 489 WHO 2016 recommendations on antenatal care for positive pregnancy experience.
- 490 Transforming our world: the 2030 Agenda for Sustainable Development. Sustainable  
491 Development Knowledge Platform [Internet]. Available from:  
492 <https://sustainabledevelopment.un.org/post2015/transformingourworld>.
- 493 Zhou, H. (2018). "Impact of Improved Antenatal Care on Maternal and Neonatal Health  
494 Outcomes: A Systematic Review and Meta-analysis." *Journal of Maternal and Child Health*, 25(3),  
495 210-225.
- 496
- 497 Alkema, L., Chou, D., Hogan, D., Zhang, S., Moller, A. B., Gemmill, A., ... & Say, L. (2016).  
498 "Global, regional, and national levels and trends in maternal mortality between 1990 and 2015,  
499 with scenario-based projections to 2030: a systematic analysis by the UN Maternal Mortality  
500 Estimation Inter-Agency Group." *The Lancet*, 387(10017), 462-474.
- 501
- 502 Tunçalp, O., Pena-Rosas, J. P., Lawrie, T., Bucagu, M., Oladapo, O. T., Portela, A., ... &  
503 Gülmezoglu, A. M. (2016). [Title of the Study]. *Bulletin of the World Health Organization*.
- 504
- 505 Pell, C., Meñaca, A., Were, F., Afrah, N. A., Chatio, S., Manda-Taylor, L., ... & Pool, R. (2016).  
506 "Factors affecting antenatal care attendance: results from qualitative studies in Ghana, Kenya and  
507 Malawi." *PLOS Medicine*, 13(2), e1001985.
- 508
- 509 Say, L., Chou, D., Gemmill, A., Tunçalp, Ö., Moller, A. B., Daniels, J., ... & Alkema, L. (2014).  
510 "Global causes of maternal death: a WHO systematic analysis." *The Lancet*, 384(9948), 980-1004.
- 511
- 512 Garcia, D., et al. (2021). "Media Exposure and Quality of Antenatal Care: A Longitudinal  
513 Analysis." *Health Education Research*, 25(4), 450-465.
- 514 Kenya Service Provision Assessment Survey 2010
- 515 Johnson, E., et al. (2019). "Urbanization and Antenatal Care Quality: Insights from a Community  
516 Health Survey." *Journal of Community Health*, 8(1), 55-68.
- 517 Lee, H., & Kim, S. (2023). "Regional Disparities in Antenatal Care Quality: A Comparative Study  
518 of Administrative Regions." *Journal of Obstetrics and Gynecology*, 12(6), 789-802.

- 519 Wang, X., et al. (2022). "Role of Frequent Antenatal Care Visits in Improving Maternal and Child  
520 Health Outcomes." *BMC Pregnancy and Childbirth*, 30(5), 320-335.
- 521 Gupta, S., & Sharma, R. (2023). "The Economics of Antenatal Care: A Cost-Benefit Analysis."  
522 *Journal of Health Economics*, 20(3), 275-290.
- 523 Nguyen, T., et al. (2020). "Association Between Antenatal Care Frequency and Birth Outcomes:  
524 A Retrospective Cohort Study." *Maternal and Child Health Journal*, 18(4), 480-495.
- 525 Ajibola Idowu (2022). "Factors Influencing Quality of Antenatal Care Services Utilization in  
526 Nigeria." *Journal of Public Health*, 15(3), 210-225.
- 527 Ministry of Health Kenya. (2021). Kenya Health Sector Strategic and Investment Plan 2018-2023.  
528 Nairobi: Ministry of Health Kenya.
- 529 Ministry of Health Kenya. (2021). Kenya Health Sector Strategic and Investment Plan 2018-2023.  
530 Nairobi: Ministry of Health Kenya.
- 531 Smith, A., [et al.] (2020). "Factors Influencing Antenatal Care Utilization Among Women in  
532 Urban Areas." *Journal of Health Sciences*, 10(2), 112-125.
- 533 Garcia, D., [et al.] (2021). "Factors Influencing Quality Antenatal Care Utilization Among Women  
534 in Rural Areas of Sub-Saharan Africa." *African Journal of Health Sciences*, 7(3), 210-225.
- 535 Zhao, S., Zhang, Y., Xiao, A. Y., He, Q., & Tang, K. (2023). Key factors associated with quality  
536 of postnatal care: a pooled analysis of 23 countries. *EClinicalMedicine*, 62.
- 537 Kare, A. P., Gujo, A. B., & Yote, N. Y. (2021). "Quality of antenatal care and associated factors  
538 among pregnant women attending government hospitals in Sidama Region, Southern  
539 Ethiopia." *Sage Journals*, [Volume(Issue)], [Page Range].  
540 <https://doi.org/10.1177/20503121211058055>
- 541 Njiru, J. N., Njoroge, P., Wanjau, J., Karanja, J., & Bingham, A. (2020). Factors influencing male  
542 involvement in maternal and child health services in sub-Saharan Africa: a scoping review. *BMC*  
543 *Pregnancy and Childbirth*, 20(1), 595.
- 544 Mwangome, F., Gathara, D., Nyachio, D., & English, M. (2020). Regional disparities in antenatal  
545 care quality in Kenya: a retrospective analysis of 10 years of nationally representative facility data.  
546 *BMC Pregnancy and Childbirth*, 20(1), 342.
- 547 Awolaye, A.F., Victor, C., & Alawode, O.A. (2018). Women autonomy and maternal healthcare  
548 services utilization among young ever-married women in Nigeria. *International Journal of Nursing*  
549 *and Midwifery*, 10(6), 62-73. DOI: 10.5897/IJNM2018.0302
- 550
- 551 Haider, M.R., Qureshi, Z.P., & Khan, M.M. (2017). Effects of women's autonomy on maternal  
552 healthcare utilization in Bangladesh: evidence from a national survey. *Sexual and Reproductive*  
553 *Healthcare*, 14, 40-47. DOI: 10.1016/j.srhc.2017.09.002
- 554

- 555 Tuncalp, O., Pena-Rosas, J. P., Lawrie, T., Bucagu, M., Oladapo, O. T., Portela, A., ... &  
556 Gülmezoglu, A. M. (2016). [Title of the Study]. *Bulletin of the World Health Organization*.
- 557 Pell, C., Meñaca, A., Were, F., Afrah, N. A., Chatio, S., Manda-Taylor, L., ... & Pool, R. (2016).  
558 "Factors affecting antenatal care attendance: results from qualitative studies in Ghana, Kenya and  
559 Malawi." *PLOS Medicine*, 13(2), e1001985.
- 560 Say, L., Chou, D., Gemmill, A., Tunçalp, Ö., Moller, A. B., Daniels, J., ... & Alkema, L. (2014).  
561 "Global causes of maternal death: a WHO systematic analysis." *The Lancet*, 384(9948), 980-1004.
- 562 Johnson, E., et al. (2019). "Urbanization and Antenatal Care Quality: Insights from a Community  
563 Health Survey." *Journal of Community Health*, 8(1), 55-68.
- 564 Charles Wembonyama Mpoy1, M. M. (2022). Determinants of Utilization and Quality of  
565 Antenatal.
- 566 Smith, A., [et al.] (2020). "Factors Influencing Antenatal Care Utilization Among Women in  
567 Urban Areas." *Journal of Health Sciences*, 10(2), 112-125.
- 568 Garcia, D., [et al.] (2021). "Factors Influencing Quality Antenatal Care Utilization Among Women  
569 in Rural Areas of Sub-Saharan Africa." *African Journal of Health Sciences*, 7(3), 210-225.
- 570 Mwangome, F., Gathara, D., Nyachio, D., & English, M. (2020). Regional disparities in antenatal  
571 care quality in Kenya: a retrospective analysis of 10 years of nationally representative facility data.  
572 *BMC Pregnancy and Childbirth*, 20(1), 342.
- 573
- 574 Wang, X., et al. (2022). "Role of Frequent Antenatal Care Visits in Improving Maternal and Child  
575 Health Outcomes." *BMC Pregnancy and Childbirth*, 30(5), 320-335.
- 576 Gupta, S., & Sharma, R. (2023). "The Economics of Antenatal Care: A Cost-Benefit Analysis."  
577 *Journal of Health Economics*, 20(3), 275-290.
- 578 Lee, H., & Kim, S. (2023). "Regional Disparities in Antenatal Care Quality: A Comparative Study  
579 of Administrative Regions." *Journal of Obstetrics and Gynecology*, 12(6), 789-802.
- 580 Nguyen, T., et al. (2020). "Association Between Antenatal Care Frequency and Birth Outcomes:  
581 A Retrospective Cohort Study." *Maternal and Child Health Journal*, 18(4), 480-495.
- 582 Ministry of Health Kenya. (2021). *Kenya Health Sector Strategic and Investment Plan 2018-2023*.  
583 Nairobi: Ministry of Health Kenya.
- 584
